# Supplementary material for: Modelling the impacts of an invasive species across landscapes: a step-wise approach
Source: PeerJ. 2014 Jun 12;2:e435. doi: 10.7717/peerj.435 (PMC4060016; doi:10.7717/peerj.435)
Supplement: Supplemental Information 1 [file peerj-02-435-s001.xlsx]

## Sheet: current distribution
#id	Source	Entomological AreaCode	Lat	Long	Year
1	NZAC04032247	AK	-36.6304	174.749	1979
2	Te Papa Museum	AK	-36.6117	174.782	1979
3	NZAC04031384	AK	-36.6304	174.749	1983
4	NZAC04032141	AK	-36.9249	174.753	1984
5	NZAC04031321	AK	-36.9174	174.649	1984
6	NZAC04032701	AK	-36.8748	174.804	1984
7	NZAC04031385	AK	-36.8748	174.804	1984
8	Auckland Musuem-AMNZ24282	AK	-36.8566	174.783	1984
9	Te Papa Museum	BP	-38.3345	175.167	1984
10	NZAC04032137	AK	-36.8921	174.731	1985
11	NZAC04032911	AK	-36.8921	174.731	1985
12	NZAC04031310	AK	-36.8921	174.731	1985
13	NZAC04032501	AK	-36.8115	174.725	1985
14	Auckland Musuem-AMNZ54820	AK	-36.8498	174.859	1985
15	NZAC04032750	AK	-36.8918	174.689	1986
16	NZAC04031686	AK	-36.8918	174.689	1986
17	NZAC04032131	AK	-36.9243	174.698	1986
18	NZAC04031198	HB	-39.5028	176.893	1986
19	NZAC04032292	HB	-39.5028	176.893	1986
20	Auckland Musuem-AMNZ24283	AK	-36.853	174.704	1986
21	Te Papa Museum	HB	-39.5028	176.893	1986
22	Te Papa Museum	AK	-36.8577	174.818	1986
23	NZAC04031935	AK	-36.8921	174.731	1987
24	NZAC04032675	AK	-36.8918	174.689	1987
25	NZAC04031211	AK	-36.7824	174.617	1987
26	NZAC04031029	AK	-36.769	174.766	1987
27	NZAC04031779	AK	-36.8221	174.798	1987
28	NZAC04031210	AK	-37.2053	174.904	1987
29	NZAC04031701	ND	-35.6217	174.538	1988
30	NZAC04031941	ND	-35.2832	174.093	1988
31	NZAC04031054	AK	-36.8921	174.731	1988
32	NZAC04030990	AK	-36.8921	174.731	1988
33	NZAC04032175	AK	-36.913	174.733	1988
34	NZAC04031502	AK	-36.913	174.733	1988
35	NZAC04031896	AK	-36.8918	174.689	1988
36	NZAC04031147	AK	-36.8918	174.689	1988
37	NZAC04032895	AK	-36.9089	174.689	1988
38	NZAC04031149	AK	-36.8919	174.649	1988
39	NZAC04031174	AK	-36.8345	174.609	1988
40	NZAC04031168	AK	-36.8345	174.609	1988
41	NZAC04032727	AK	-36.9837	174.472	1988
42	NZAC04032446	AK	-36.862	174.578	1988
43	NZAC04031477	AK	-36.6052	174.893	1988
44	NZAC04031728	AK	-36.7447	174.76	1988
45	NZAC04032143	AK	-36.8497	174.822	1988
46	NZAC04032372	AK	-36.8058	174.747	1988
47	NZAC04032521	AK	-36.9316	174.666	1988
48	NZAC04032339	AK	-36.9029	174.743	1988
49	NZAC04032034	AK	-36.9	174.931	1988
50	NZAC04032809	AK	-36.8654	174.869	1988
51	NZAC04031408	AK	-37.2671	174.955	1988
52	NZAC04030869	ND	-36.0887	174.6	1989
53	NZAC04031011	ND	-35.3622	173.54	1989
54	NZAC04031176	AK	-36.8341	174.654	1989
55	NZAC04032230	AK	-36.9363	174.666	1989
56	NZAC04032467	AK	-36.4011	174.663	1989
57	NZAC04032863	AK	-36.8128	174.725	1989
58	NZAC04031224	AK	-36.8763	174.765	1989
59	NZAC04031028	AK	-36.868	174.792	1989
60	NZAC04031214	AK	-36.9	174.931	1989
61	NZAC04031089	WO	-37.785	175.276	1989
62	NZAC04031219	BP	-37.6885	176.141	1989
63	Te Papa Museum	HB	-39.5028	176.893	1989
64	Te Papa Museum	WN	-41.2143	174.905	1989
65	Te Papa Museum	AK	-36.8513	174.763	1989
66	NZAC04031494	ND	-35.3148	174.115	1990
67	NZAC04033013	AK	-36.8625	174.669	1990
68	NZAC04032320	AK	-36.8128	174.725	1990
69	NZAC04030977	AK	-36.8128	174.725	1990
70	NZAC04032377	AK	-36.7886	174.767	1990
71	NZAC04032661	AK	-37.0637	174.955	1990
72	NZAC04031651	AK	-36.5702	174.377	1991
73	NZAC04031958	AK	-36.9279	174.697	1992
74	NZAC04031196	AK	-36.9279	174.697	1992
75	Lincoln Musuem	BP	-38.3515	177.534	1992
76	Clapperton et al 1996	NN	-41.2757	173.265	1992
77	Clapperton et al 1996	WN	-41.2186	174.806	1992
78	Clapperton et al 1996	WA	-40.9432	175.635	1992
79	Clapperton et al 1996	WI	-39.9322	175.025	1992
80	Clapperton et al 1996	HB	-39.3934	176.82	1992
81	Clapperton et al 1996	HB	-39.5064	176.889	1992
82	Clapperton et al 1996	HB	-39.638	176.831	1992
83	Clapperton et al 1996	GB	-38.646	178.007	1992
84	Clapperton et al 1996	TO	-38.8682	175.268	1992
85	Clapperton et al 1996	BP	-37.9721	177.032	1992
86	Clapperton et al 1996	BP	-38.0783	176.71	1992
87	Clapperton et al 1996	BP	-38.141	176.234	1992
88	Clapperton et al 1996	BP	-37.77	176.29	1992
89	Clapperton et al 1996	BP	-37.6877	176.137	1992
90	Clapperton et al 1996	WO	-38.0507	174.817	1992
91	Clapperton et al 1996	WO	-38.0345	174.93	1992
92	Clapperton et al 1996	WO	-37.8048	174.87	1992
93	Clapperton et al 1996	WO	-37.7262	175.145	1992
94	Clapperton et al 1996	WO	-37.7653	175.268	1992
95	Clapperton et al 1996	WO	-37.8931	175.459	1992
96	Clapperton et al 1996	WO	-37.9162	175.296	1992
97	Clapperton et al 1996	WO	-37.6411	175.527	1992
98	Clapperton et al 1996	BP	-37.5294	175.689	1992
99	Clapperton et al 1996	BP	-37.5513	175.907	1992
100	Clapperton et al 1996	WO	-37.2709	175.479	1992
101	Clapperton et al 1996	WO	-37.3622	175.419	1992
102	Clapperton et al 1996	BP	-37.3642	175.663	1992
103	Clapperton et al 1996	BP	-37.389	175.837	1992
104	Clapperton et al 1996	WO	-37.3122	174.842	1992
105	Clapperton et al 1996	CL	-36.6924	175.429	1992
106	Clapperton et al 1996	CL	-36.7125	175.606	1992
107	Clapperton et al 1996	CL	-36.7155	175.792	1992
108	Clapperton et al 1996	CL	-36.7221	175.724	1992
109	Clapperton et al 1996	CL	-36.8333	175.687	1992
110	Clapperton et al 1996	CL	-37.2124	175.871	1992
111	Clapperton et al 1996	CL	-37.1377	175.555	1992
112	Clapperton et al 1996	CL	-36.9084	175.774	1992
113	Clapperton et al 1996	ND	-35.2519	173.209	1992
114	Clapperton et al 1996	ND	-35.1129	173.261	1992
115	Clapperton et al 1996	ND	-35.1564	173.158	1992
116	Clapperton et al 1996	ND	-34.9738	173.383	1992
117	Clapperton et al 1996	ND	-34.9873	173.603	1992
118	Clapperton et al 1996	ND	-35.0819	173.77	1992
119	Clapperton et al 1996	ND	-35.927	173.867	1992
120	Clapperton et al 1996	ND	-35.927	173.867	1992
121	Clapperton et al 1996	ND	-35.4097	173.502	1992
122	Clapperton et al 1996	ND	-35.3128	173.768	1992
123	Clapperton et al 1996	ND	-35.2232	173.938	1992
124	Clapperton et al 1996	ND	-35.3517	174.283	1992
125	Clapperton et al 1996	ND	-35.5606	174.465	1992
126	Clapperton et al 1996	ND	-35.8392	174.535	1992
127	Clapperton et al 1996	ND	-35.7121	174.302	1992
128	Clapperton et al 1996	ND	-35.884	174.409	1992
129	Clapperton et al 1996	ND	-36.022	174.48	1992
130	Clapperton et al 1996	CL	-36.2553	175.43	1992
131	Clapperton et al 1996	CL	-36.1611	175.363	1992
132	Clapperton et al 1996	AK	-36.6796	174.44	1992
133	Clapperton et al 1996	AK	-36.8321	174.426	1992
134	Clapperton et al 1996	AK	-36.9793	174.479	1992
135	Clapperton et al 1996	AK	-36.7844	175.043	1992
136	Clapperton et al 1996	AK	-36.9594	175.234	1992
137	Clapperton et al 1996	AK	-36.9448	175.147	1992
138	Clapperton et al 1996	AK	-36.6293	174.763	1992
139	Clapperton et al 1996	AK	-36.7929	174.732	1992
140	Clapperton et al 1996	AK	-36.8529	174.758	1992
141	Clapperton et al 1996	AK	-36.8876	174.907	1992
142	Clapperton et al 1996	AK	-36.9785	174.861	1992
143	Clapperton et al 1996	AK	-36.9638	174.63	1992
144	Clapperton et al 1996	AK	-37.0662	174.954	1992
145	Clapperton et al 1996	AK	-37.2014	174.894	1992
146	Clapperton et al 1996	AK	-36.7791	174.56	1992
147	NZAC04031730	BP	-37.5769	177.996	1993
148	Lincoln Musuem	MC	-43.572	172.626	1995
149	Auckland Musuem-AMNZ24281	AK	-36.8754	174.802	1996
150	Lincoln Musuem	WO	-37.5402	175.71	1996
151	Te Papa Museum	WN	-41.2529	174.904	1996
152	Otago Musuem	WI	-39.9444	174.999	1997
153	Auckland Musuem-AMNZ24280	ND	-35.534	173.389	1998
154	Auckland Musuem-AMNZ23641	AK	-36.8572	174.818	1998
155	Otago Musuem	WI	-39.9373	175.021	1998
156	Auckland Musuem-AMNZ47173	AK	-36.8089	174.722	1999
157	Auckland Musuem-AMNZ25862	AK	-36.8821	174.526	1999
158	Auckland Musuem-AMNZ25863	AK	-36.8821	174.526	1999
159	Auckland Musuem-AMNZ47172	AK	-36.8089	174.722	1999
160	Lincoln Musuem	MC	-43.5708	172.64	1999
161	Lincoln Musuem	HB	-39.5028	176.893	1999
162	Public record	WI	-39.8364	175.352	1999
163	NZAC04032883	AK	-36.6164	174.722	2000
164	NZAC04031499	AK	-36.9	174.931	2000
165	Auckland Musuem-AMNZ46045	CL	-36.4331	175.769	2000
166	Auckland Musuem-AMNZ46046	CL	-36.4331	175.769	2000
167	Auckland Musuem-AMNZ46044	CL	-36.4331	175.769	2000
168	Auckland Musuem-AMNZ48134	CL	-36.728	175.882	2000
169	Otago Musuem	WI	-39.9444	174.999	2000
170	Auckland Musuem-AMNZ47175	CL	-36.2661	175.492	2001
171	Auckland Musuem-AMNZ47176	CL	-36.3174	175.541	2001
172	Auckland Musuem-AMNZ47174	CL	-36.2661	175.492	2001
175	Auckland Musuem-AMNZ51504	CL	-36.2451	175.478	2002
176	Auckland Musuem-AMNZ54821	CH	-44.0047	-176.581	2002
177	Public record	WI	-40.3546	175.617	2003
178	Auckland Musuem-AMNZ60814	CL	-36.2586	175.43	2004
179	Te Papa Museum	WN	-40.8904	174.981	2005
180	Public record	NN	-41.7999	172.325	2007
181	Auckland Musuem-AMNZ81136	AK	-37.0391	174.507	2008
182	Auckland Musuem-AMNZ81137	AK	-37.0391	174.507	2008
183	Auckland Musuem-AMNZ81138	AK	-37.0391	174.507	2008
184	Public record	WI	-40.3546	175.617	2009
185	NZAC04035304	TK	-39.0673	174.025	2010
242	NZAC04044983	TO	-38.6891	176.094	2011
243	Public record	AK	-36.5641	174.695	2011
244	Public record	HB	-39.4692	176.87	2011
245	Public record	MB	-41.5088	173.962	2011
246	Public record	NN	-41.277	173.281	2011
247	Public record	NN	-41.2129	173.36	2011
248	Public record	NN	-41.3407	173.191	2011
249	Public record	NN	-41.3633	173.145	2011
250	Public record	NN	-41.3647	173.078	2011
251	Public record	NN	-41.2737	173.168	2011
252	Public record	NN	-41.253	173.09	2011
253	Public record	NN	-41.1931	173.053	2011
254	Public record	NN	-41.1134	173.01	2011
255	Public record	NN	-40.6229	172.915	2011
256	Public record	NN	-40.8463	172.839	2011
257	Public record	WI	-39.9147	175.099	2011
258	NZAC04044982	MC	-43.5969	172.618	2012
259	Field plot 2012	AK	-36.7936	174.752	2012
260	Field plot 2012	AK	-36.8781	174.848	2012
261	Field plot 2012	AK	-36.814	174.788	2012
262	Field plot 2012	AK	-37.0169	174.607	2012
263	Field plot 2012	AK	-36.9949	174.602	2012
264	Field plot 2012	AK	-36.8023	174.75	2012
265	Field plot 2012	AK	-36.8179	174.795	2012
266	Field plot 2012	AK	-36.882	174.838	2012
267	Field plot 2012	AK	-36.7933	174.723	2012
268	Field plot 2012	AK	-36.997	174.568	2012
269	Field plot 2012	AK	-36.7837	174.709	2012
270	Field plot 2012	AK	-36.8847	174.845	2012
271	Field plot 2012	AK	-36.8043	174.781	2012
272	Field plot 2012	AK	-36.8103	174.781	2012
273	Field plot 2012	AK	-36.8078	174.752	2012
274	Field plot 2012	AK	-36.8882	174.84	2012
275	Field plot 2012	AK	-36.8872	174.845	2012
276	Field plot 2012	AK	-36.8073	174.745	2012
277	Field plot 2012	AK	-36.8682	174.883	2012
278	Field plot 2012	AK	-36.8682	174.824	2012
279	Field plot 2012	ND	-35.7215	174.314	2012
280	Field plot 2012	AK	-37.0428	174.507	2012
281	Public record	AK	-37.1042	174.947	2012
282	Public record	AK	-36.9774	174.839	2012
283	Public record	AK	-36.8823	174.897	2012
284	Public record	AK	-36.9123	174.738	2012
285	Public record	AK	-36.9984	174.884	2012
286	Public record	BP	-37.5484	175.704	2012
287	Public record	BP	-37.4845	175.601	2012
288	Public record	CL	-36.1988	175.471	2012
289	Public record	CO	-45.2319	169.378	2012
290	Public record	GB	-38.9671	177.407	2012
291	Public record	GB	-39.0408	177.424	2012
292	Public record	MC	-43.5778	172.611	2012
293	Public record	ND	-34.5783	172.795	2012
294	Public record	ND	-35.3994	173.504	2012
295	Public record	NN	-41.3172	173.228	2012
296	Public record	NN	-41.2628	172.823	2012
297	Public record	NN	-40.8472	172.873	2012
298	Public record	NN	-41.321	173.466	2012
299	Public record	NN	-41.6119	171.876	2012
300	Public record	NN	-41.2951	173.241	2012
301	Public record	NN	-41.3455	173.154	2012
302	Public record	NN	-41.3405	173.199	2012
303	Public record	NN	-41.1125	173.016	2012
304	Public record	SD	-41.0557	173.765	2012
305	Public record	TO	-38.6813	176.058	2012
306	Public record	TO	-38.7033	176.034	2012
307	Public record	WA	-40.9371	175.63	2012
308	Public record	WI	-40.3362	175.611	2012
309	Public record	WN	-40.9167	174.981	2012
310	Public record	WN	-40.8869	174.984	2012
311	Public record	WN	-40.8764	175.071	2012
